# Supplementary material for: Adenosine integrates light and sleep signalling for the regulation of circadian timing in mice
Source: PubMed Central journal article supplement (PMC8035342; doi:10.1038/s41467-021-22179-z), 2021-04-09
Supplement: 41467_2021_22179_MOESM1_ESM.pdf [file 41467_2021_22179_MOESM1_ESM.pdf]

1 Supplementary Material

2

3 Jagannath et al.

4

5 **Adenosine integrates light and sleep signalling for the regulation of circadian timing in**

6 **mice**

7

8

## Supplementary Fig 1

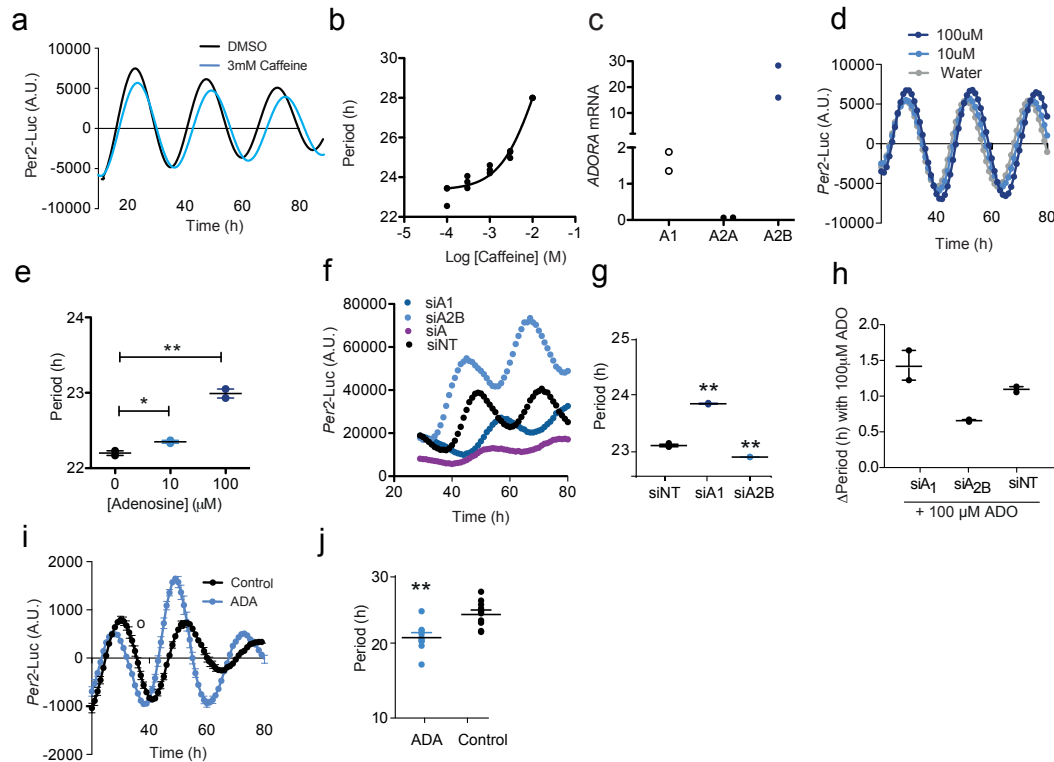

10

11 **Supplementary Figure 1: Caffeine and adenosine regulate cellular circadian rhythms.**

12 (a) Caffeine increased period length in *Per2-Luc* U2OS cells in a concentration-dependent  
 13 manner, and summarised in (b, n=3); (c) Levels of adenosine receptor subtype (*ADORA*)  
 14 mRNA in U2OS cells as measured by qPCR, n=2; (d) Period length of *Per2-Luc* U2OS cells  
 15 treated with 100µM (dark blue), 10µM (light blue) adenosine, and water (grey) and  
 16 summarised in (e)  $p=0.0016$ , one-way ANOVA); (f) Representative traces (single) of *Per2-Luc*  
 17 U2OS period length with siRNA-mediated knockdown of *ADORA1* (siA1, dark blue) and  
 18 *ADORA2B* (siA2B, light blue), control (siINT, black), with knockdown of both A<sub>1</sub> and A<sub>2B</sub> in  
 19 purple (siA). Results (f) are summarised in (g), n=3,  $p<0.0000001$ ); (h) Knockdown of A<sub>2B</sub>  
 20 receptors reduces the period lengthening effects of adenosine, whilst the knockdown of A<sub>1</sub>  
 21 produces the opposite effect; (i) Reducing extracellular adenosine by addition of adenosine  
 22 deaminase (ADA – 0.5U) reduces period length, the control is heat denatured ADA, with  
 23 results summarised in (j), n=10. ( $*=p0.0031$ , two tailed unpaired t-test). Error bars are SEM  
 24 dot plots.

25

26

27

28

## Supplementary Fig. 2

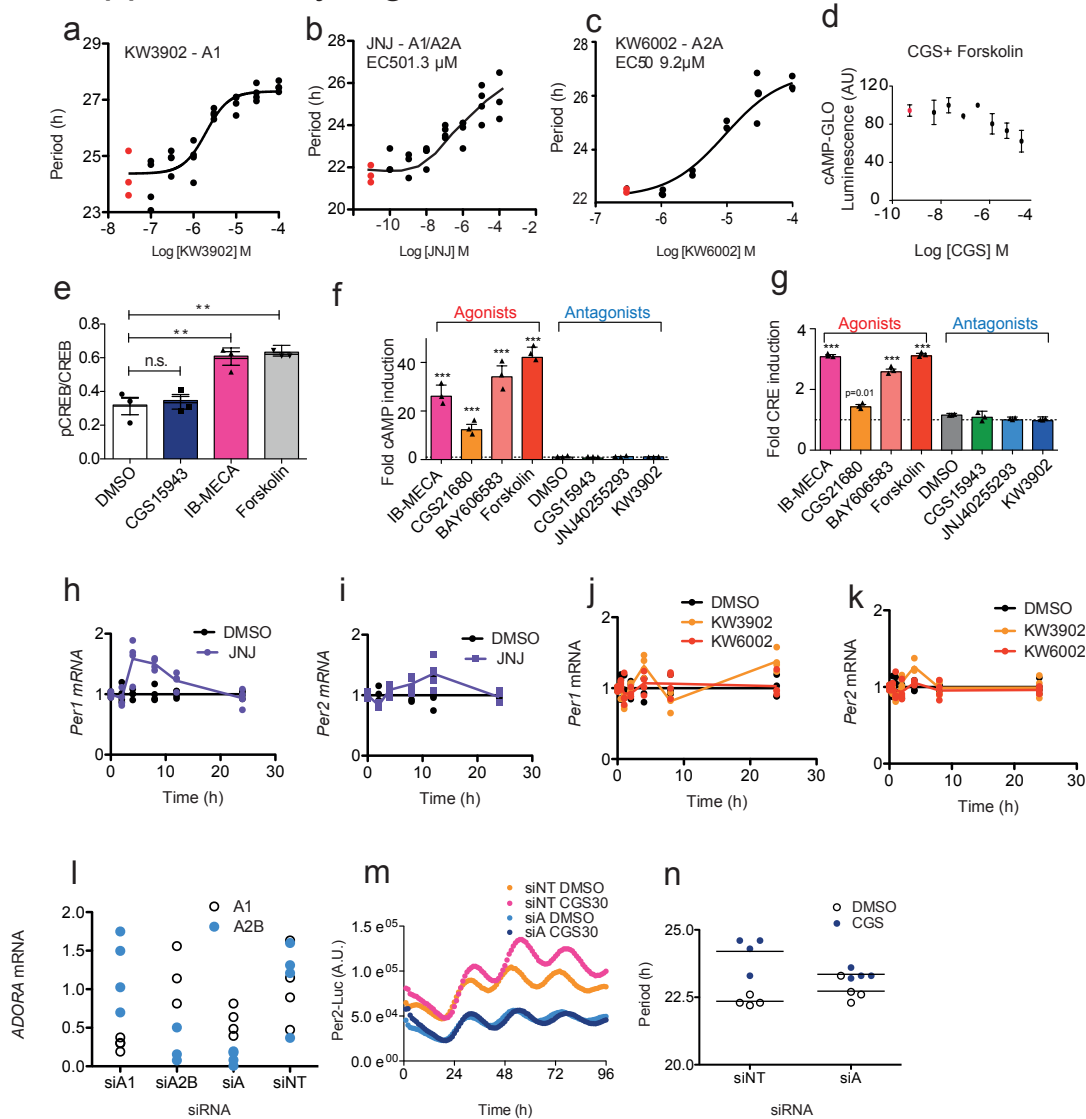

30

31 **Supplementary Figure 2: Mechanism of action of adenosine signalling to the clock.**32 Concentration-dependent period lengthening in *Per2*-Luc U2OS cells elicited by (a) KW390233 (A<sub>1</sub> antagonist); (b) JNJ (A<sub>2A</sub>/A<sub>1</sub> antagonist); and (c) KW6002 (A<sub>2A</sub> antagonist); (d) CGS dose-

34 dependently blocks forskolin (10 μM)-mediated increases in cAMP as measured with the

35 cAMP-GloSensor reporter; DMSO controls for a-d indicated in red. (e) Quantification of

36 pCREB from western blots shown in Figure 1 (d) and (l) (n=3 p=0.002 and 0.001 for IB-MECA

37 and Forskolin with Dunnet's multiple comparison test following one way ANOVA); (f) cAMP

38 increases as monitored by the cAMP-GLO assay and quantified at 15min following drug

39 addition (10 μM), n=3, \*\*\* = significantly different from DMSO control, p &lt; 0.00001, not

40 quantified or otherwise indicated, one-way ANOVA with Dunnett's post-hoc correction; (g)

41 CRE-Luc induction after 4h of treatment drugs at 10 μM. Dotted lines indicate control levels

42 and n=3, \*\*\* = significantly different from DMSO control, p < 0.00001, not quantified or  
43 otherwise indicated, one-way ANOVA with Dunnett's post-hoc correction; (h) JNJ increased  
44 *PER1* expression (significant at 4h & 8h, p<0.01) and (i) *PER2* significant at 4h, 8h and 12h  
45 (p<0.01); (j and k) In contrast to JNJ, specific A<sub>1</sub> and A<sub>2A</sub> antagonists KW3902 10μM and  
46 KW6002 10μM caused no significant changes to *PER1/2* levels; (l) After siRNA-mediated  
47 knockdown of *ADORA1* (siA1) *ADORA2B* (siA2B) or both receptors (siA), period lengthening  
48 in Per2-Luc U2OS cells by CGS is lost (m) (negative control siNT DMSO, negative control  
49 siRNA drug treated - siNT CGS 30μM – C30 Adenosine receptor siRNA DMSO treated - siA  
50 DMSO Adenosine receptor siRNA, drug treated - siA CGS 30μM – C30). The results are  
51 quantified in (n). Error bars = S.E.M., Two-way ANOVA, \*=p<0.05, \*\*=p<0.01 from Bonferroni  
52 post-hoc tests.

53

54

# Supplementary Fig. 3

a

```

seq3  GCCAACGTAATCACCCAGTGATTCATCTAATTCGCGAAGCGATTTTTGTGTTTGACCTAGCATTGGC
seq7  GCCAGGTCGATTCAAGCGATTGTATTGCGAAACGGTTTGACGCGTTTAGTTCCGATTGCGTCTGACAT.
seq18 GCCACTTGCGATTGTGTCTATTTTAGGCTAATGTTGTTATGCCCTTATGCCGGCTAGCTTGAGCGGAAGT.
seq24 GCCATGGTGGGGTGTTTACAAGTTAGTCAAAAGTCTTACGCAATTTAAATATTTTTCCGACGTCGTTATG.
seq27 GCCAACGTAATCACCCAGTGATTCATCTAATTCGCGAAGCGATTTTTGTGTTTGACCTAGCATTGGC.
seq29 GCCAAATGTGACATCCAATAATTTGTCGGGCAGATCTGAGTCACAGTCTGTTGGAGCGTTAGTGACGT.
seq28 GCCATGGTGGGGTGTTTACAAGTTAGTCAAAGTCTTACGCAATTTAAATATTTTTCCGACGTCGTTATG.
    
```

b

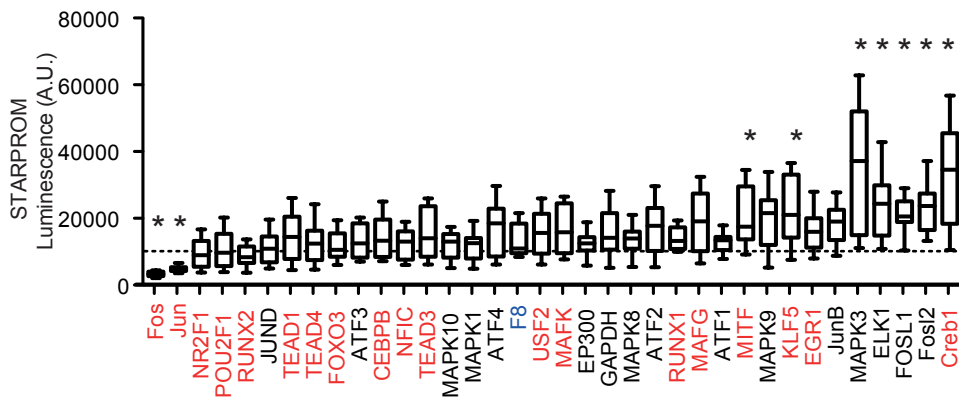

c

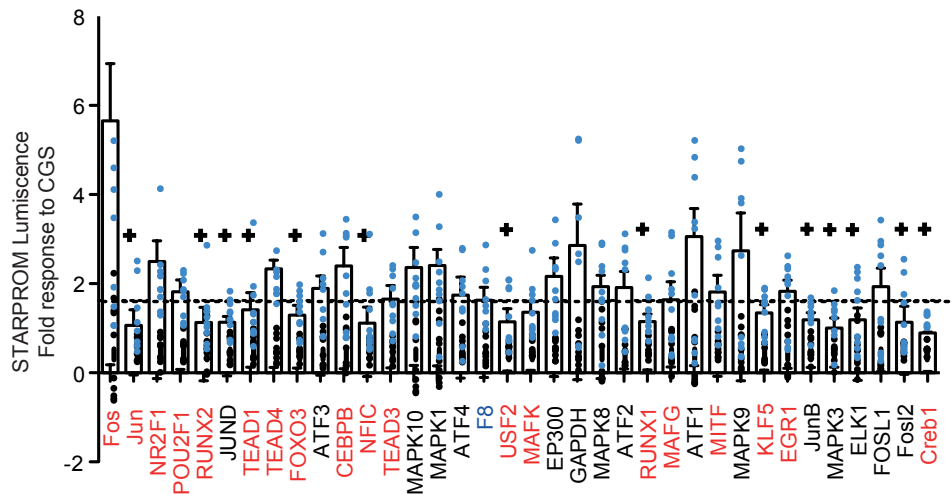

55

56 **Supplementary Figure 3: STAR-PROM identified the AP-1 response element (RE)**

57 **downstream of adenosine signalling.** (a) Sequence of the 7 clones with AP-1 RE

58 highlighted in red; (b) Baseline expression of clone3 and (c) fold change in response to 10 $\mu$ M

59 CGS. Treatments on x-axis in both (b) and (c) are siRNAs against the genes encoding multiple

60 transcription factors and related signalling elements that were immunoprecipitated by the bait

61 sequence from clone3. Genes whose knockdown significantly altered the expression of clone3

62 or reduced its response to CGS are indicated in red. Two-way ANOVA with Dunnett's post-

63 hoc test,  $p < 0.05 = *$  difference from F8 control for (b) and no significant induction in response  
 64 to CGS indicated by + (c). Dotted lines are negative control siRNA transfected cells and  $n=8$   
 65 replicates for this experiment, Tukey's box plots used throughout (central line - mean, box  
 66 represents 25<sup>th</sup> to 75<sup>th</sup> percentile data, whiskers are 1.5 interquartile range). Individual p-  
 67 values are too many to list, and hence please refer to source data.  
 68  
 69

### Supplementary Fig. 4

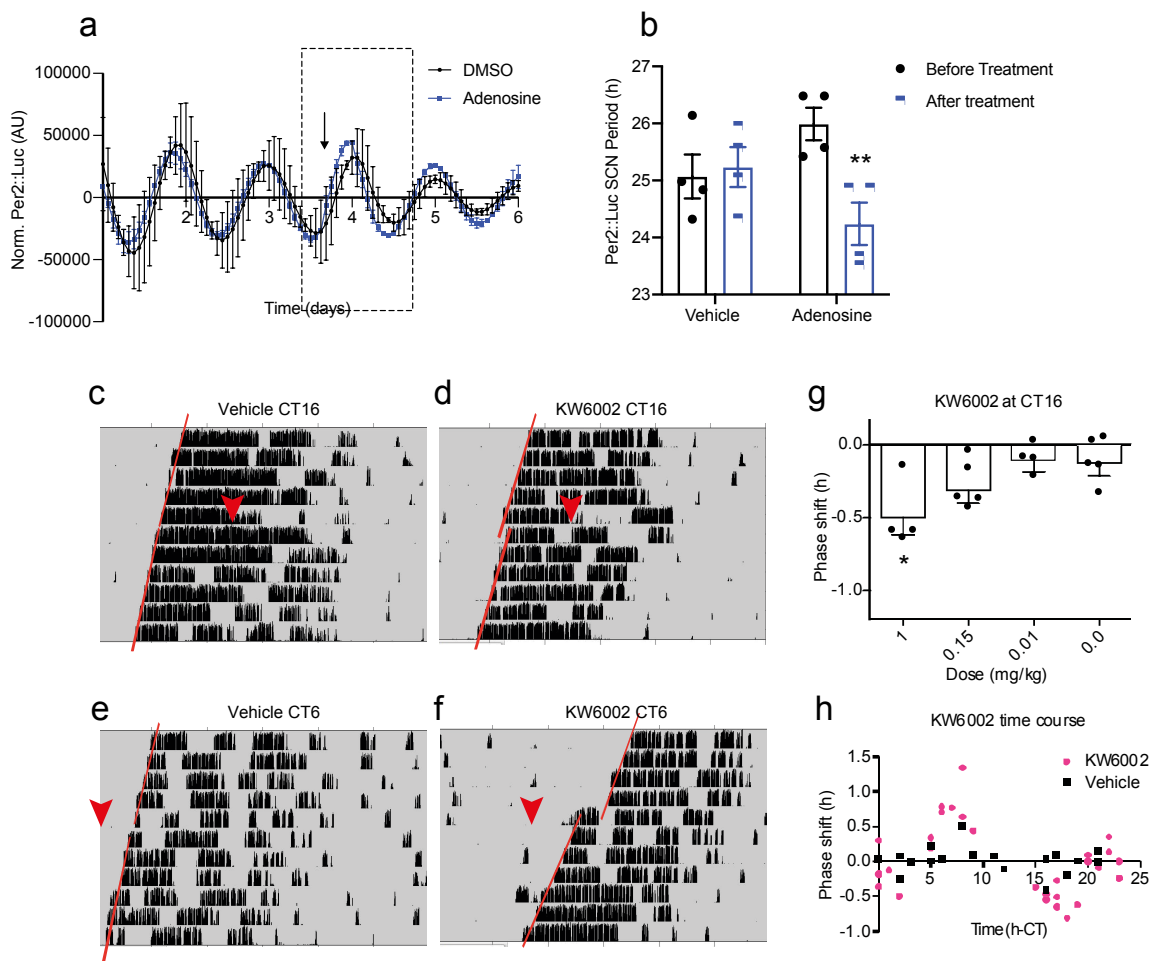

70  
71

72 **Supplementary Figure 4: A<sub>2A</sub>/A<sub>1</sub> adenosine receptor antagonists modify circadian wheel**  
 73 **running behaviour.** (a) Per2::Luc SCN slices treated with 250uM adenosine, added at arrow  
 74 (n=4), summarised in (b), n=4, p=0.004 after treatment with adenosine which reduces period  
 75 by 1.7h, no significant difference with vehicle, box indicates analysis window. (c) Animals were  
 76 housed in constant dark and at the red arrow received either vehicle or (d) 1mg/kg KW6002  
 77 (A<sub>2A</sub> antagonist) at CT16 (c,d) and CT6 (e,f). Onsets of activity were measured (red lines); (g)

78 phase delay shifts were plotted. KW6002 causes phase delays in a dose-dependent manner  
 79 at CT16 (n=4-5, p=0.02 for 1mg kw6002 over control with dunnetts multiple comparison, one-  
 80 way ANOVA) (h) The phase response curve (PRC) to KW6002 (1mg/kg) is plotted and  
 81 KW6002 induced larger phase shifts than the control. A total of 12 animals received one  
 82 injection a week for a total of 6 weeks of either KW6002 or vehicle in a randomised manner  
 83 and data collated. Two-way ANOVA with Bonferroni post-hoc test - \*p<0.05, \*\*p<0.01. Error  
 84 bars are SEM on bar charts.  
 85

## Supplementary Fig. 5

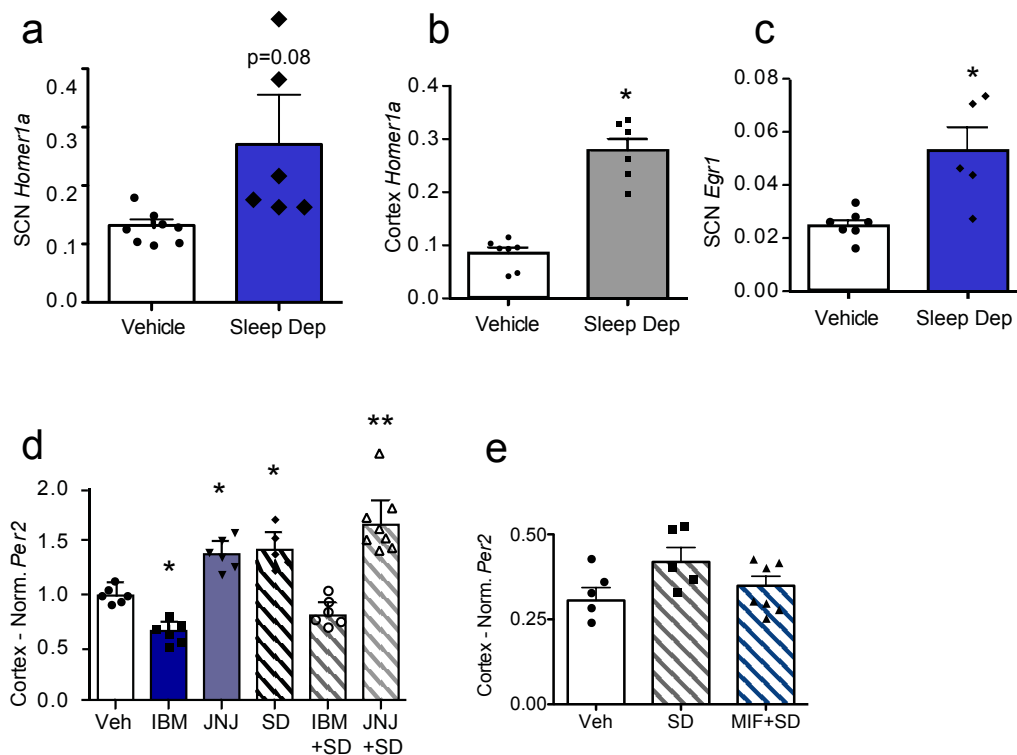

86

87 **Supplementary Figure 5: Sleep deprivation alters clock gene expression within the SCN**  
 88 **and cortex** (a) *Homer1a* mRNA levels within the SCN (b) within the cortex immediately after  
 89 6h sleep deprivation (c) *Egr1* within the SCN after sleep deprivation. (p=0.08, 0.000003303  
 90 and .0037 for a,b, and c, two tailed unpaired t-test, n=5-8.) The expression of both genes  
 91 have previously been shown to be correlated with sleep deprivation<sup>45</sup>. (d) Sleep deprivation  
 92 increases *Per2* expression within the cortex as previously reported. This effect is engaged  
 93 by JNJ and suppressed by IB-MECA (p=0.0008, SD vs IBM+SD). One-way ANOVA with  
 94 Sidak's test for multiple comparisons, stars indicate p-values compared with vehicle (p=0.014  
 95 for IBM, 0.033 for JNJ, 0.049 for SD, <0.0001 for JNJ+SD). (e) We speculated this increase  
 96 in *Per2* was as a result of increased glucocorticoid signalling due to sleep deprivation<sup>62</sup>. This  
 97 was tested by the administration of mifepristone (a glucocorticoid antagonist) which as

98 anticipated abolished the increase in *Per2*. (n=8, error bars = S.E.M.). Error bars are SEM on  
 99 bar charts.  
 100

Supplementary Fig. 6

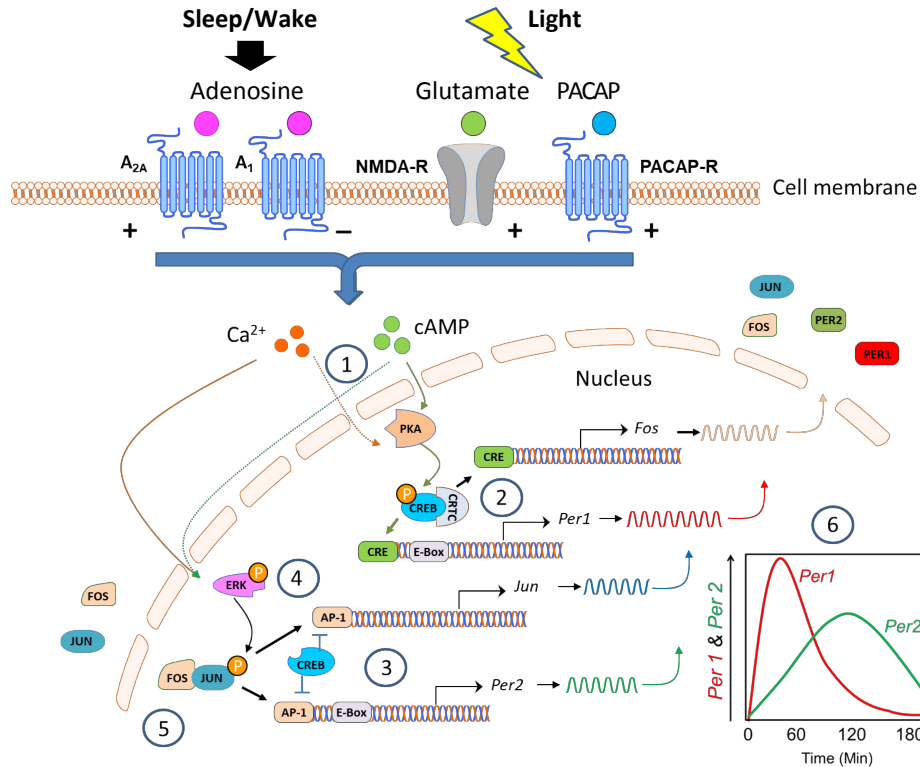

101  
 102

103 **Supplementary Figure 6: Model delineating signalling pathways downstream of both**  
 104 **adenosine and light signalling within the SCN. (1)** Adenosine signals through G<sub>i</sub> (A<sub>1</sub>) or G<sub>s</sub>  
 105 (A<sub>2A</sub>) coupled receptors (Suppl. Fig. 1c- and Fig. 3a) to alter levels of cAMP and intracellular  
 106 Ca<sup>2+</sup><sup>20,21</sup>. As demonstrated in this paper, adenosine receptor (AR) antagonists and agonists  
 107 differentially alter Ca<sup>2+</sup> (Fig.2h) and cAMP (Suppl. Fig. 2f) respectively. The adenosine  
 108 receptor sub-type expressed on a cell will define the response to adenosine. In SCN neurones,  
 109 the A<sub>1</sub> receptor expression is 5-fold greater than A<sub>2A</sub> (Fig. 3a). As a result, adenosine will inhibit  
 110 this pathway. Significantly, adenosine acts upon the same pathways as light. Light induces  
 111 the release of glutamate and PACAP from photosensitive retinal ganglion cells. NMDA and  
 112 PACAP receptors activated on SCN neurons release Ca<sup>2+</sup> and cAMP respectively; **(2)** cAMP  
 113 activates protein kinase A (PKA) which phosphorylates CREB (Fig. 1d and 3d). pCREB in  
 114 concert with co-activators such as CRTC binds CREs on *Fos* and *Per1* driving their  
 115 transcription<sup>2,56</sup>. **(3)** Unphosphorylated CREB competes for AP-1 response elements (REs)  
 116 resulting in repression<sup>30</sup>. The phosphorylation of CREB (or its removal as in Suppl. Figure 3b-  
 117 c) will derepress AP-1 REs, including those on *Per2* and *Jun*<sup>30</sup>. **(4)** Increased intracellular Ca<sup>2+</sup>



118 results in the activation (phosphorylation) of ERK1/2 (Fig. 2d and Fig. 3d) which increases  
 119 transcription of *Jun*<sup>24</sup> (Fig. 2g). ERK also phosphorylates JUN, pJUN and FOS heterodimerise  
 120 to form the AP-1 transcription factor<sup>24</sup>. **(5)** AP-1 drives transcription of *Per2* (Fig. 1j and Fig.  
 121 3e), *Jun* (Fig. 2g) and other genes with AP-1 REs (Fig. 2b). **(6)** The net result is a rapid  
 122 induction of *Per1* through CREB and a slower more sustained induction of *Per2* through AP-  
 123 1. The resulting phase shift of the circadian clock is therefore the integrated product of  
 124 sleep/wake history and light.

125  
 126

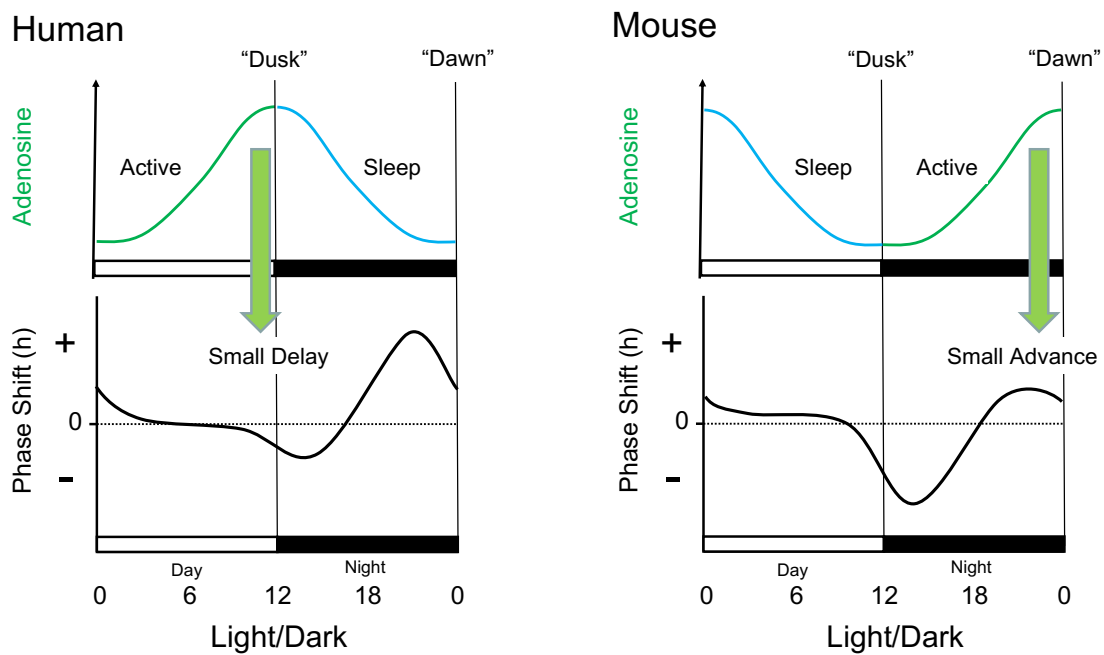

127  
 128  
 129

130 **Supplementary Figure 7: Model of adenosine's effect on the phase response curve.** In  
 131 mice, a nocturnal species with a short free-running period ( $\tau$ ), the PRC shows large  
 132 delays around dusk and small advances around dawn, whilst the PRC of humans, a diurnal  
 133 species with long  $\tau$  has small delays at dusk and large advances at dawn<sup>63</sup>. Mice would  
 134 have high levels of adenosine at dawn which would act to attenuate light responses at this  
 135 time, whereas the reverse would be true at dusk.

136  
 137  
 138

139 **Summary table of drugs used and their affinities to the adenosine receptors.** Suppl.  
 140 Table 1.

141

| Name | A1 (Kd/Ex50)<br>nm | A2a<br>(Kd/Ex50) nm | A2B<br>(Kd/Ex50) nm | A3 (Kd/Ex50)<br>nm | A1 vs A2A<br>Selectivity |
|------|--------------------|---------------------|---------------------|--------------------|--------------------------|
|------|--------------------|---------------------|---------------------|--------------------|--------------------------|

|             |        |      |       |        |              |
|-------------|--------|------|-------|--------|--------------|
| KW3902      | 0.19   | 170  | 52    | >10000 | 895 (A2a/A1) |
| KW6002      | 11,169 | 151  | 2,701 | 1,939  | 74 (A1/A2a)  |
| CGS15943    | 3.5    | .8   | 50    | >10000 | 4 (A1/A2a)   |
| JNJ40255293 | 48     | 6.6  | 230   | 9200   | 7 (A1/A2a)   |
| IB-Meca     | 51     | 2520 | 11000 | 1.2    | 56 (A2a/A1)  |
| Adenosine   | 100    | 310  | 15000 | 290    | 3(A2a/A1)    |

142  
143  
144  
145  
146  
147  
148  
149  
150

References for drugs:

KW-3902<sup>11</sup>

KW-6002<sup>12</sup>

CGS15943<sup>13</sup>

JNJ-40255293<sup>14</sup>

IB-meca<sup>15</sup>

Adenosine<sup>16</sup>

151  
152

- 153 1 Yoo, S. H. *et al.* PERIOD2::LUCIFERASE real-time reporting of circadian dynamics  
154 reveals persistent circadian oscillations in mouse peripheral tissues. *Proc Natl Acad*  
155 *Sci U S A* **101**, 5339-5346, doi:10.1073/pnas.0308709101 (2004).
- 156 2 Fedele, D. E. *et al.* Astroglialosis in epilepsy leads to overexpression of adenosine  
157 kinase, resulting in seizure aggravation. *Brain* **128**, 2383-2395,  
158 doi:10.1093/brain/awh555 (2005).
- 159 3 Ramanathan, C. *et al.* Cell type-specific functions of period genes revealed by novel  
160 adipocyte and hepatocyte circadian clock models. *PLoS Genet* **10**, e1004244,  
161 doi:10.1371/journal.pgen.1004244 (2014).
- 162 4 Palchykova, S. *et al.* Manipulation of adenosine kinase affects sleep regulation in  
163 mice. *J Neurosci* **30**, 13157-13165, doi:10.1523/JNEUROSCI.1359-10.2010 (2010).
- 164 5 Peirson, S. N., Butler, J. N. & Foster, R. G. Experimental validation of novel and  
165 conventional approaches to quantitative real-time PCR data analysis. *Nucleic Acids*  
166 *Res* **31**, e73 (2003).
- 167 6 Jagannath, A. *et al.* The CRTCL1-SIK1 pathway regulates entrainment of the  
168 circadian clock. *Cell* **154**, 1100-1111, doi:S0092-8674(13)00961-6 [pii]  
169 10.1016/j.cell.2013.08.004 (2013).
- 170 7 Gosselin, P., Rando, G., Fleury-Olela, F. & Schibler, U. Unbiased identification of  
171 signal-activated transcription factors by barcoded synthetic tandem repeat promoter  
172 screening (BC-STAR-PROM). *Gene Dev* **30**, 1895-1907, doi:10.1101/gad.284828  
173 (2016).
- 174 8 Lavery, D. J. & Schibler, U. Circadian Transcription of the Cholesterol 7-Alpha  
175 Hydroxylase Gene May Involve the Liver-Enriched Bzip Protein Dbp. *Gene Dev* **7**,  
176 1871-1884, doi:DOI 10.1101/gad.7.10.1871 (1993).

- 177 9 Jutras, B. L., Verma, A. & Stevenson, B. Identification of novel DNA-binding proteins  
178 using DNA-affinity chromatography/pull down. *Curr Protoc Microbiol* **Chapter 1**,  
179 Unit1F 1, doi:10.1002/9780471729259.mc01f01s24 (2012).
- 180 10 Masino, S. A., Latini, S., Bordoni, F., Pedata, F. & Dunwiddie, T. V. Changes in  
181 hippocampal adenosine efflux, ATP levels, and synaptic transmission induced by  
182 increased temperature. *Synapse* **41**, 58-64, doi:10.1002/syn.1060 (2001).
- 183 11 Nonaka, H. *et al.* KW-3902, a selective high affinity antagonist for adenosine A1  
184 receptors. *Br J Pharmacol* **117**, 1645-1652, doi:10.1111/j.1476-5381.1996.tb15335.x  
185 (1996).
- 186 12 Yang, M. *et al.* Characterization of the potency, selectivity, and pharmacokinetic  
187 profile for six adenosine A2A receptor antagonists. *Naunyn Schmiedebergs Arch*  
188 *Pharmacol* **375**, 133-144, doi:10.1007/s00210-007-0135-0 (2007).
- 189 13 Ongini, E., Dionisotti, S., Gessi, S., Irenius, E. & Fredholm, B. B. Comparison of CGS  
190 15943, ZM 241385 and SCH 58261 as antagonists at human adenosine receptors.  
191 *Naunyn Schmiedebergs Arch Pharmacol* **359**, 7-10 (1999).
- 192 14 Atack, J. R. *et al.* JNJ-40255293, a novel adenosine A2A/A1 antagonist with efficacy  
193 in preclinical models of Parkinson's disease. *ACS Chem Neurosci* **5**, 1005-1019,  
194 doi:10.1021/cn5001606 (2014).
- 195 15 Klotz, K. N. *et al.* Comparative pharmacology of human adenosine receptor subtypes  
196 - characterization of stably transfected receptors in CHO cells. *Naunyn*  
197 *Schmiedebergs Arch Pharmacol* **357**, 1-9 (1998).
- 198 16 Yan, L., Burbiel, J. C., Maass, A. & Muller, C. E. Adenosine receptor agonists: from  
199 basic medicinal chemistry to clinical development. *Expert Opin Emerg Drugs* **8**, 537-  
200 576, doi:10.1517/14728214.8.2.537 (2003).

201

202

Fig. 1d and 1i  
CREB

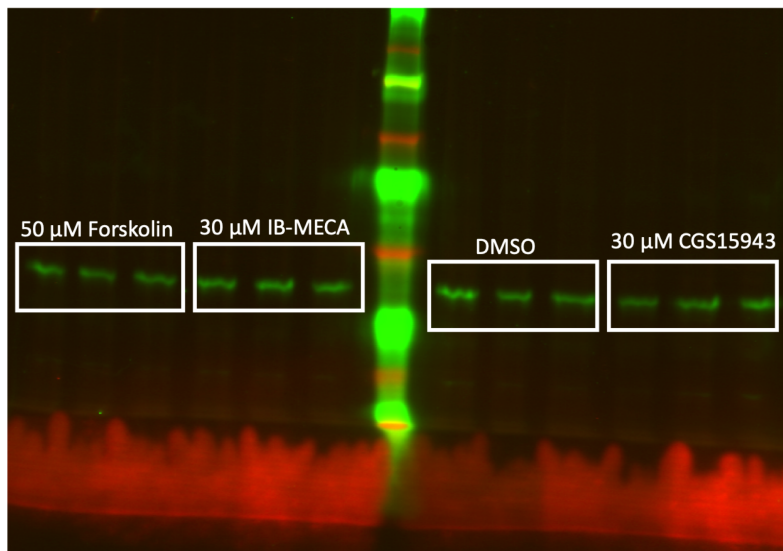

203

Fig. 1d and 1i  
pCREB

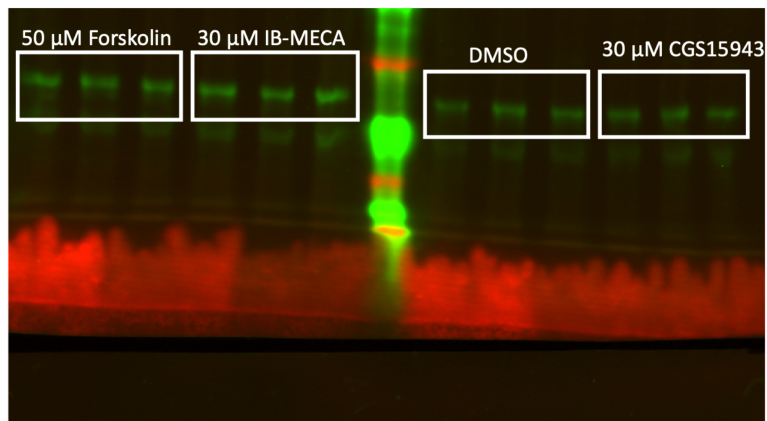

204  
205  
206  
207  
208  
209  
210  
211  
212  
213  
214  
215  
216

217

218

219 Fig 2f ERK (above) and pERK (below)

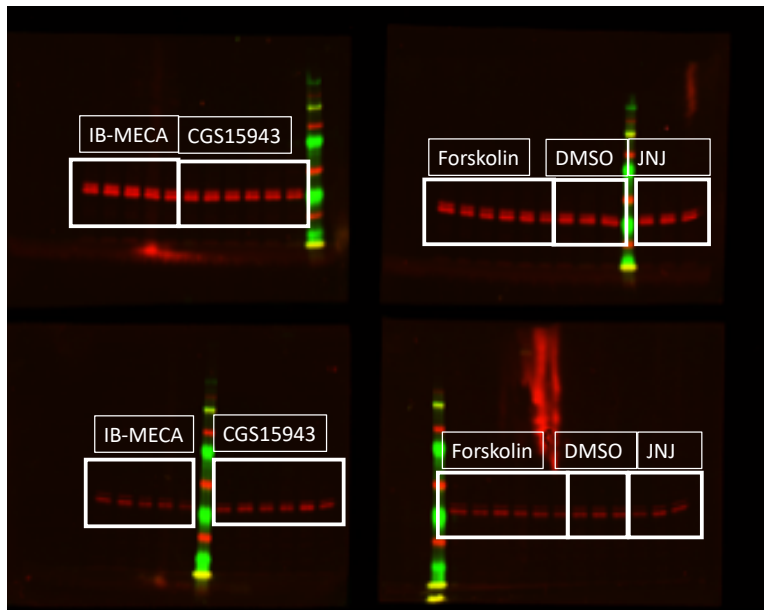

220

221

222 Fig. 3d (pERK)

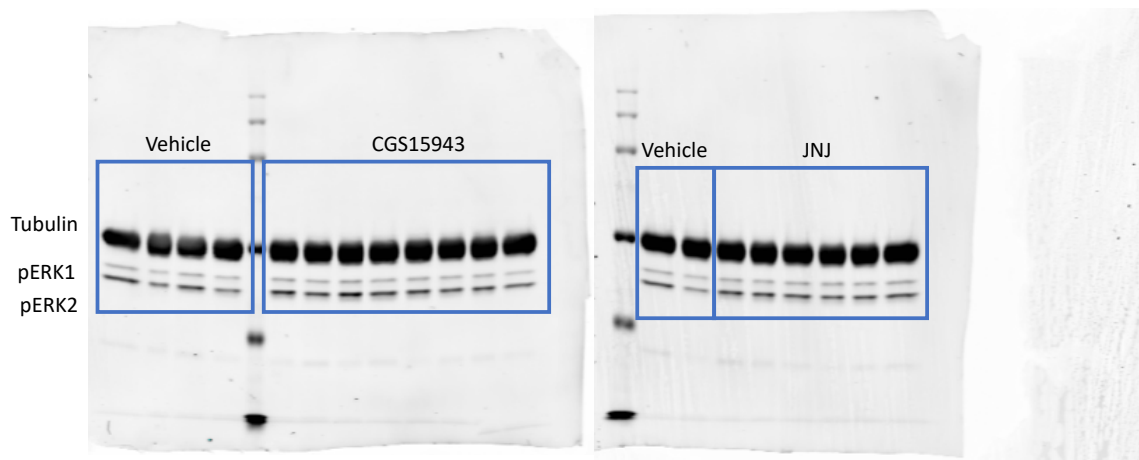

223

224

225

226

227

228

229

230

231

232

233

234

235

236 Fig 3d (pCREB)

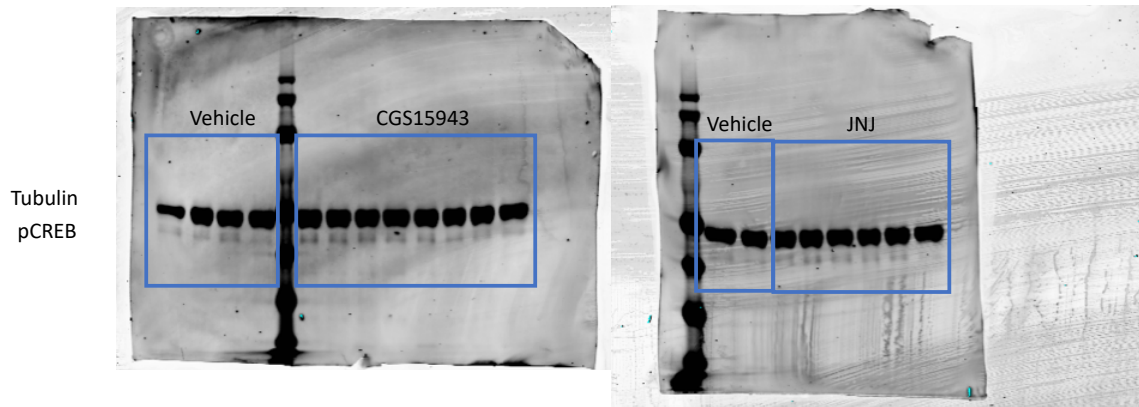

237  
238 Fig. 3d (pERK) and Fig. 3d (pCREB)

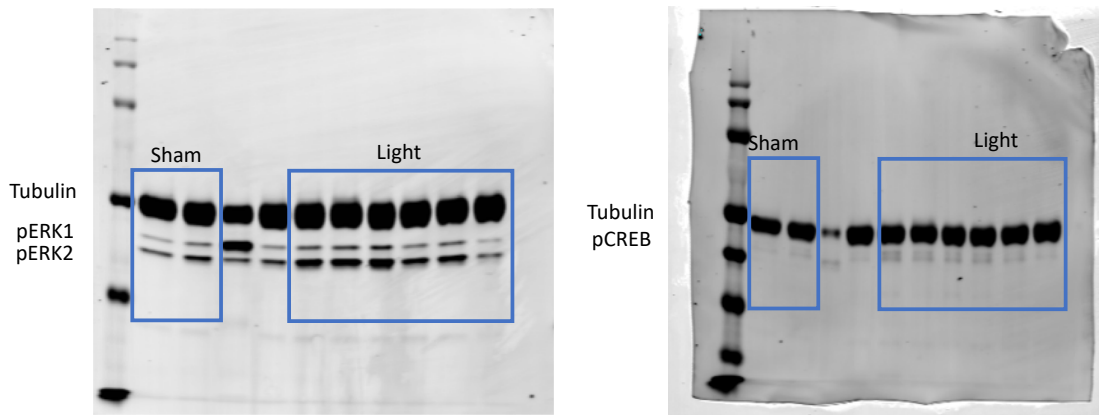

239
